# Supplementary material for: Quantitative determination of intact free cisplatin in cell models by LC-ICP-MS
Source: Royal Society of Chemistry journal article supplement (doi:10.1039/c0ja00047g), 2010-10-14

LC-ICP-MS analysis of cytosol from cell line P31, after 24 hours of incubation with 5  $\mu\text{M}$  cisplatin using the separation on graphitized carbon (Hypercarb column) with and without spiking with 10  $\mu\text{g L}^{-1}$  cisplatin

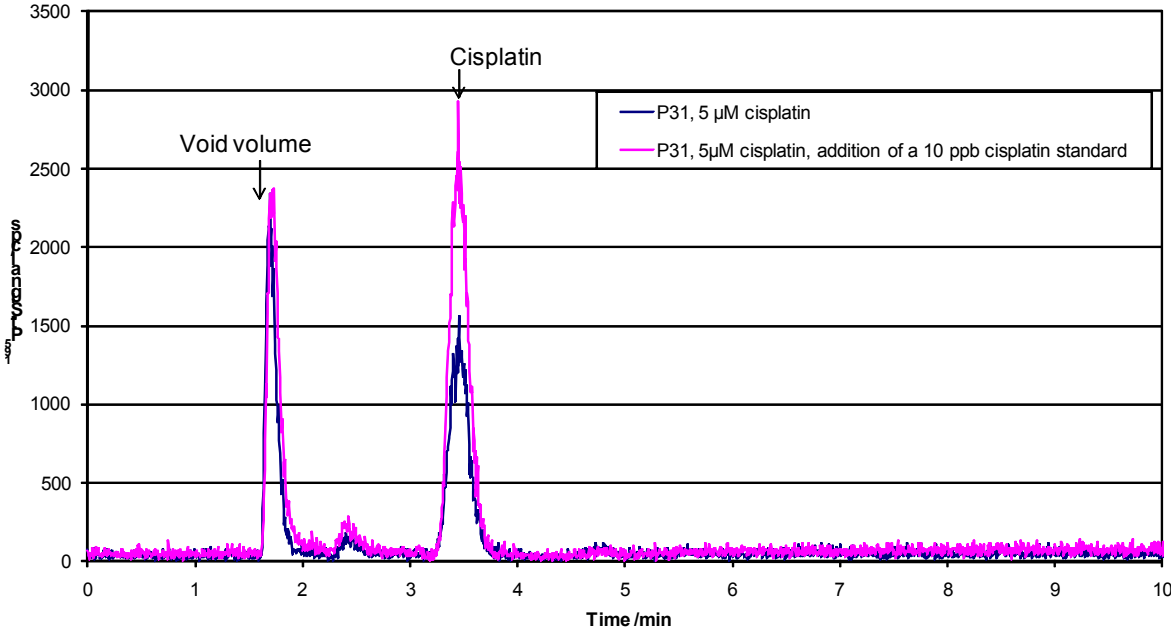

Supplement: c0ja00047g.pdf [file c0ja00047g.pdf]
